# Supplementary material for: Potential therapeutic agents of Bombyx mori silk cocoon extracts from agricultural product for inhibition of skin pathogenic bacteria and free radicals
Source: PeerJ. 2024 Jun 17;12:e17490. doi: 10.7717/peerj.17490 (PMC11188935; doi:10.7717/peerj.17490)
Supplement: File S1 [file peerj-12-17490-s001.xlsx]

## Sheet: Sheet1
Raw data 1 Standard curve of gallic acid for calculation of total phenolic contents
		Total Phenolic compound
Standard of Gallic acid	OD 725			OD725-control
Conc. Gallic acid (mg/ml)	Rpt.1	Rpt.2	Rpt.3	Rpt.1	Rpt.2	Rpt.3	Average	SD
0.01	0.112	0.141	0.101	0.062	0.087	0.046	0.065	0.020664
0.02	0.232	0.194	0.21	0.182	0.14	0.155	0.159	0.0212838
0.03	0.305	0.298	0.288	0.255	0.244	0.233	0.244	0.011
0.04	0.37	0.372	0.371	0.32	0.318	0.316	0.318	0.002
0.05	0.473	0.472	0.464	0.423	0.418	0.409	0.416667	0.0070946
0.06	0.624	0.597	0.538	0.574	0.543	0.483	0.533333	0.0462637
0.07	0.681	0.685	0.651	0.631	0.631	0.596	0.619333	0.0202073
0.08	0.821	0.87	0.867	0.771	0.816	0.812	0.799667	0.0249065
0.09	0.967	0.939	0.923	0.917	0.885	0.868	0.89	0.0248797
0.1	1.061	1.065	1.114	1.011	1.011	1.059	1.027	0.0277128
control	0.05	0.054	0.055
