# Supplementary material for: Potential therapeutic agents of Bombyx mori silk cocoon extracts from agricultural product for inhibition of skin pathogenic bacteria and free radicals
Source: PeerJ. 2024 Jun 17;12:e17490. doi: 10.7717/peerj.17490 (PMC11188935; doi:10.7717/peerj.17490)
Supplement: File S2 [file peerj-12-17490-s002.xlsx]

## Sheet: Sheet1
Raw data 2 Standard curve of quercetin for calculation of total flavonoid contents
		Total flavonoids
	OD415			OD415 - control
Quercetin (mg/ml)	Rpt.1	Rpt.2	Rpt.3	Rpt.1	Rpt.2	Rpt.3	ค่าเฉลี่ย	SD
0.00781	0.072	0.073	0.074	0.07	0.072	0.072	0.0713333	0.0011547
0.01563	0.144	0.152	0.155	0.142	0.151	0.153	0.148667	0.00585947
0.03125	0.295	0.304	0.307	0.293	0.303	0.305	0.300333	0.0064291
0.0625	0.593	0.607	0.627	0.591	0.606	0.625	0.607333	0.0170392
0.125	1.2	1.202	1.229	1.198	1.201	1.227	1.20867	0.0159478
control	0.002	0.001	0.002
