# Supplementary material for: Potential therapeutic agents of Bombyx mori silk cocoon extracts from agricultural product for inhibition of skin pathogenic bacteria and free radicals
Source: PeerJ. 2024 Jun 17;12:e17490. doi: 10.7717/peerj.17490 (PMC11188935; doi:10.7717/peerj.17490)
Supplement: File S3 [file peerj-12-17490-s003.xlsx]

## Sheet: Sheet1
Raw data 3 Standard curve of gallic acid for calculation of antioxidant activity
		Antioxidant activity By DPPH assay
	OD517			%Inhibition
Gallic acid (mg/ml)	Rpt.1	Rpt.2	Rpt.3	Rpt.1	Rpt.2	Rpt.3	Average	SD
0.001	0.671	0.679	0.667	12.7438	10.1852	12.2368	11.722	1.3548
0.002	0.541	0.56	0.572	29.6489	25.9259	24.7368	26.7706	2.56264
0.003	0.453	0.47	0.463	41.0923	37.8307	39.0789	39.334	1.64571
0.004	0.365	0.362	0.366	52.5358	52.1164	51.8421	52.1648	0.349347
0.005	0.278	0.277	0.279	63.8492	63.3598	63.2895	63.4995	0.304868
0.006	0.164	0.184	0.155	78.6736	75.6614	79.6053	77.9801	2.06138
0.007	0.099	0.115	0.104	87.1261	84.7884	86.3158	86.0768	1.18708
0.008	0.072	0.069	0.066	90.6372	90.873	91.3158	90.942	0.344518
0.009	0.05	0.049	0.05	93.498	93.5185	93.4211	93.4792	0.0513924
0.01	0.042	0.042	0.042	94.5384	94.4444	94.4737	94.4855	0.0480599
control	0.769	0.756	0.76
