# Supplementary material for: Potential therapeutic agents of Bombyx mori silk cocoon extracts from agricultural product for inhibition of skin pathogenic bacteria and free radicals
Source: PeerJ. 2024 Jun 17;12:e17490. doi: 10.7717/peerj.17490 (PMC11188935; doi:10.7717/peerj.17490)
Supplement: File S4 [file peerj-12-17490-s004.xlsx]

## Sheet: Sheet1
Raw data 4 HPLC analysis
HPLC: Detection of gallic and quercetin in silk extract
Standard gallic acid					Standard quercetin
Conc. (ug/ml)	Peak area	Peak area	Average		Conc. (ug/ml)	Peak area	Peak area	Average
2000	1629.3	1630	1629.65		125	4519.2	4283.1	4401.15
1000	764.6	759	761.8		62.5	2252.6	2250	2251.3
500	387.7	380	383.85		31.25	1231.5	1230	1230.75
250	193.85	190	191.925		15.63	617.8	620	618.9
125	115	117	116		7.81	308.1	305.2	306.65
Peak area of SCP, SCWP and SP after detection of gallic acid and quercetin compounds by HPLC assay
Samples	Concentration (mg/ml)	Peak area of gallic acid			Peak area of quercetin
		Rpt.1	Rpt.2	Rpt.3	Rpt.1	Rpt.2	Rpt.3
SCP 9 h	50	1270.4	1270	1269.2	0	0	0
SCP 12 h	50	338	340	337	0	0	0
SCWP 9 h	50	380.1	379.9	382.8	49.1	44.1	45.8
SCWP 12 h	50	336	340	335.4	29.5	30.2	30.1
SP	50	2609.6	2600	2606.3	0	0	0
