# Supplementary material for: Potential therapeutic agents of Bombyx mori silk cocoon extracts from agricultural product for inhibition of skin pathogenic bacteria and free radicals
Source: PeerJ. 2024 Jun 17;12:e17490. doi: 10.7717/peerj.17490 (PMC11188935; doi:10.7717/peerj.17490)
Supplement: File S5 [file peerj-12-17490-s005.xlsx]

## Sheet: Sheet1
Raw data 5 The absorbance of crystal violet on preformed biofilm
SCP 9 h				SCP 12 h				Gallic acid				Quercetin
	OD 592				OD 592				OD 592				OD 592
S. aureus	Rpt.1	Rpt.2	Rpt.3	S. aureus	Rpt.1	Rpt.2	Rpt.3	S. aureus	Rpt.1	Rpt.2	Rpt.3	S. aureus	Rpt.1	Rpt.2	Rpt.3
Dose 50 mg/ml	0.789	0.795	0.818	Dose 25 mg/ml	0.885	1.095	1.052	Dose 1.25 mg/ml	0.42	0.425	0.498	Dose 1.25 mg/ml	0.359	0.36	0.361
Dose 25 mg/ml	1.731	1.837	1.86	Dose 12.5 mg/ml	2.126	2.103	2.147	Dose 0.625 mg/ml	1.784	1.75	1.725	Dose 0.625 mg/ml	1.375	1.365	1.355
Untreated	3.008	3.121	3.145	Untreated	3.008	3.121	3.145	Untreated	3.008	3.121	3.145	Untreated	3.008	3.121	3.145
	OD 592				OD 592				OD 592				OD 592
MRSA	Rpt.1	Rpt.2	Rpt.3	MRSA	Rpt.1	Rpt.2	Rpt.3	MRSA	Rpt.1	Rpt.2	Rpt.3	MRSA	Rpt.1	Rpt.2	Rpt.3
Dose 25 mg/ml	0.333	0.362	0.334	Dose 25 mg/ml	0.476	0.426	0.488	Dose 2.5 mg/ml	0.169	0.173	0.185	Dose 2.5 mg/ml	0.249	0.245	0.261
Dose 12.5 mg/ml	0.819	0.819	0.818	Dose 12.5 mg/ml	1.684	1.544	1.767	Dose 1.25 mg/ml	0.355	0.354	0.349	Dose 1.25 mg/ml	0.313	0.305	0.325
Untreated	2.812	2.814	2.816	Untreated	2.812	2.814	2.816	Untreated	2.812	2.814	2.816	Untreated	2.812	2.814	2.816
	OD 592				OD 592				OD 592				OD 592
P. aeruginosa	Rpt.1	Rpt.2	Rpt.3	P. aeruginosa	Rpt.1	Rpt.2	Rpt.3	P. aeruginosa	Rpt.1	Rpt.2	Rpt.3	P. aeruginosa	Rpt.1	Rpt.2	Rpt.3
Dose 25 mg/ml	0.796	0.767	0.756	Dose 25 mg/ml	0.987	0.936	0.954	Dose 1.25 mg/ml	0.203	0.213	0.206	Dose 1.25 mg/ml	0.262	0.26	0.259
Dose 12.5 mg/ml	1.668	1.616	1.571	Dose 12.5 mg/ml	1.117	1.183	1.193	Dose 0.625 mg/ml	0.543	0.533	0.534	Dose 0.625 mg/ml	0.711	0.715	0.72
Untreated	2.98	3.003	2.995	Untreated	2.98	3.003	2.995	Untreated	2.98	3.003	2.995	Untreated	2.98	3.003	2.995
	OD 592				OD 592				OD 592				OD 592
C. acnes	Rpt.1	Rpt.2	Rpt.3	C. acnes	Rpt.1	Rpt.2	Rpt.3	C. acnes	Rpt.1	Rpt.2	Rpt.3	C. acnes	Rpt.1	Rpt.2	Rpt.3
Dose 25 mg/ml	1.616	1.696	1.732	Dose 25 mg/ml	1.605	1.603	1.227	Dose 0.625 mg/ml	2.588	2.441	2.456	Dose 0.625 mg/ml	3.03	3.069	3.031
Dose 12.5 mg/ml	2.549	2.533	2.595	Dose 12.5 mg/ml	2.826	2.877	2.604	Dose 0.3125 mg/ml	3.006	2.862	2.915	Dose 0.3125 mg/ml	3.219	3.046	3.195
Untreated	4	4	3.948	Untreated	4	4	3.948	Untreated	4	4	3.948	Untreated	4	4	3.948
