# Supplementary material for: Potential therapeutic agents of Bombyx mori silk cocoon extracts from agricultural product for inhibition of skin pathogenic bacteria and free radicals
Source: PeerJ. 2024 Jun 17;12:e17490. doi: 10.7717/peerj.17490 (PMC11188935; doi:10.7717/peerj.17490)
Supplement: File S6 [file peerj-12-17490-s006.xlsx]

## Sheet: Sheet1
Raw data 6 The absorbance of crystal violet on mature biofilm
SCP 9 h				SCP 12 h				Gallic acid				Quercetin
	OD 592				OD 592				OD 592				OD 592
S. aureus	Rpt.1	Rpt.2	Rpt.3	S. aureus	Rpt.1	Rpt.2	Rpt.3	S. aureus	Rpt.1	Rpt.2	Rpt.3	S. aureus	Rpt.1	Rpt.2	Rpt.3
Dose 50 mg/ml	0.465	0.942	0.685	Dose 25 mg/ml	0.473	0.31	0.242	Dose 1.25 mg/ml	1.832	1.549	2.39	Dose 1.25 mg/ml	2.923	2.865	2.908
Dose 25 mg/ml	0.956	0.865	1.171	Dose 12.5 mg/ml	0.318	0.401	0.353	Dose 0.625 mg/ml	1.326	1.015	1.757	Dose 0.625 mg/ml	1.523	2.374	2.924
Untreated	0.534	0.523	0.536	Untreated	0.534	0.523	0.536	Untreated	0.752	0.605	0.534	Untreated	0.752	0.605	0.534
	OD 592				OD 592				OD 592				OD 592
MRSA	Rpt.1	Rpt.2	Rpt.3	MRSA	Rpt.1	Rpt.2	Rpt.3	MRSA	Rpt.1	Rpt.2	Rpt.3	MRSA	Rpt.1	Rpt.2	Rpt.3
Dose 25 mg/ml	0.843	1.192	1.183	Dose 25 mg/ml	0.356	0.295	0.297	Dose 2.5 mg/ml	1.161	0.655	0.656	Dose 2.5 mg/ml	0.858	0.82	0.781
Dose 12.5 mg/ml	2.014	1.581	2.006	Dose 12.5 mg/ml	0.327	0.282	0.336	Dose 1.25 mg/ml	0.909	1.119	0.965	Dose 1.25 mg/ml	2.136	2.898	2.617
Untreated	0.456	0.696	0.672	Untreated	0.456	0.696	0.672	Untreated	0.621	0.999	0.456	Untreated	0.621	0.999	0.456
	OD 592				OD 592				OD 592				OD 592
P. aeruginosa	Rpt.1	Rpt.2	Rpt.3	P. aeruginosa	Rpt.1	Rpt.2	Rpt.3	P. aeruginosa	Rpt.1	Rpt.2	Rpt.3	P. aeruginosa	Rpt.1	Rpt.2	Rpt.3
Dose 25 mg/ml	1.781	1.423	0.69	Dose 25 mg/ml	1.319	2.402	1.316	Dose 1.25 mg/ml	0.549	0.469	0.528	Dose 1.25 mg/ml	0.879	1.014	1.457
Dose 12.5 mg/ml	2.572	1.982	1.581	Dose 12.5 mg/ml	1.628	1.474	1.524	Dose 0.625 mg/ml	1.425	0.646	0.566	Dose 0.625 mg/ml	1.516	0.882	0.531
Untreated	2.408	3.157	2.064	Untreated	2.064	0.888	0.831	Untreated	2.408	3.157	2.064	Untreated	2.408	3.157	2.064
	OD 592				OD 592				OD 592				OD 592
C. acnes	Rpt.1	Rpt.2	Rpt.3	C. acnes	Rpt.1	Rpt.2	Rpt.3	C. acnes	Rpt.1	Rpt.2	Rpt.3	C. acnes	Rpt.1	Rpt.2	Rpt.3
Dose 25 mg/ml	0.179	0.223	0.288	Dose 25 mg/ml	2.614	1.546	2.591	Dose 0.625 mg/ml	2.014	1.24	0.864	Dose 0.625 mg/ml	2.134	1.618	1.302
Dose 12.5 mg/ml	0.219	0.209	0.237	Dose 12.5 mg/ml	0.294	0.283	0.306	Dose 0.3125 mg/ml	1.648	0.525	0.687	Dose 0.3125 mg/ml	1.671	1.658	2.445
Untreated	0.284	0.521	0.32	Untreated	0.32	0.362	0.384	Untreated	0.284	0.521	0.32	Untreated	0.284	0.521	0.32
