# Supplementary material for: Potential therapeutic agents of Bombyx mori silk cocoon extracts from agricultural product for inhibition of skin pathogenic bacteria and free radicals
Source: PeerJ. 2024 Jun 17;12:e17490. doi: 10.7717/peerj.17490 (PMC11188935; doi:10.7717/peerj.17490)
Supplement: File S7 [file peerj-12-17490-s007.xlsx]

## Sheet: Sheet1
Raw data 7 The absorbance of supernatant on hemolysis quantification assay
SCP 9 h				SCP 12 h				Gallic acid				Quercetin
	OD 405				OD 405				OD 405				OD 405
S. aureus	Rpt.1	Rpt.2	Rpt.3	S. aureus	Rpt.1	Rpt.2	Rpt.3	S. aureus	Rpt.1	Rpt.2	Rpt.3	S. aureus	Rpt.1	Rpt.2	Rpt.3
Dose 50 mg/ml	0.986	0.996	0.933	Dose 25 mg/ml	0.294	0.357	0.31	Dose 1.25 mg/ml	0.88	0.86	0.79	Dose 1.25 mg/ml	0.645	0.625	0.614
Dose 25 mg/ml	1.079	1.032	1.053	Dose 12.5 mg/ml	0.545	0.581	0.576	Dose 0.625 mg/ml	1.025	1.02	1.1	Dose 0.625 mg/ml	0.25	0.235	0.225
Untreated	1.165	1.215	1.187	Untreated	1.165	1.215	1.187	Untreated	1.165	1.215	1.187	Untreated	1.165	1.215	1.187
	OD 405				OD 405				OD 405				OD 405
MRSA	Rpt.1	Rpt.2	Rpt.3	MRSA	Rpt.1	Rpt.2	Rpt.3	MRSA	Rpt.1	Rpt.2	Rpt.3	MRSA	Rpt.1	Rpt.2	Rpt.3
Dose 25 mg/ml	0.773	0.799	0.762	Dose 25 mg/ml	0.373	0.38	0.365	Dose 2.5 mg/ml	0.871	0.866	0.851	Dose 2.5 mg/ml	1.285	1.292	1.295
Dose 12.5 mg/ml	1.086	1.033	1.071	Dose 12.5 mg/ml	0.616	0.639	0.603	Dose 1.25 mg/ml	1.209	1.205	1.219	Dose 1.25 mg/ml	0.322	0.312	0.331
Untreated	1.294	1.222	1.212	Untreated	1.294	1.222	1.212	Untreated	1.294	1.222	1.212	Untreated	1.294	1.222	1.212
	OD 405				OD 405				OD 405				OD 405
P. aeruginosa	Rpt.1	Rpt.2	Rpt.3	P. aeruginosa	Rpt.1	Rpt.2	Rpt.3	P. aeruginosa	Rpt.1	Rpt.2	Rpt.3	P. aeruginosa	Rpt.1	Rpt.2	Rpt.3
Dose 25 mg/ml	0.941	0.94	0.932	Dose 25 mg/ml	0.362	0.339	0.343	Dose 1.25 mg/ml	0.811	0.831	0.829	Dose 1.25 mg/ml	0.684	0.654	0.656
Dose 12.5 mg/ml	1.121	1.118	1.191	Dose 12.5 mg/ml	0.536	0.562	0.53	Dose 0.625 mg/ml	1.585	1.565	1.569	Dose 0.625 mg/ml	0.308	0.319	0.299
Untreated	1.655	1.652	1.617	Untreated	1.655	1.652	1.617	Untreated	1.655	1.652	1.617	Untreated	1.655	1.652	1.617
	OD 405				OD 405				OD 405				OD 405
C. acnes	Rpt.1	Rpt.2	Rpt.3	C. acnes	Rpt.1	Rpt.2	Rpt.3	C. acnes	Rpt.1	Rpt.2	Rpt.3	C. acnes	Rpt.1	Rpt.2	Rpt.3
Dose 25 mg/ml	0.824	0.828	0.901	Dose 25 mg/ml	0.52	0.506	0.535	Dose 0.625 mg/ml	0.665	0.669	0.683	Dose 0.625 mg/ml	0.596	0.591	0.582
Dose 12.5 mg/ml	0.919	0.924	0.928	Dose 12.5 mg/ml	0.698	0.713	0.685	Dose 0.3125 mg/ml	1.083	1.094	1.012	Dose 0.3125 mg/ml	0.368	0.38	0.375
Untreated	0.824	0.799	0.833	Untreated	0.824	0.799	0.833	Untreated	0.824	0.799	0.833	Untreated	0.824	0.799	0.833
